# Supplementary material
Source: PubMed Central journal article supplement (PMC5474303)
Supplement: NIHMS863370-supplement-Suppl_tables.pdf [file NIHMS863370-supplement-Suppl_tables.pdf]

**Supplementary table 1.** Dosimetric parameters for clinical target volumes (CTV) and selected organs at risk using IMPT for oropharyngeal carcinomas

| <b>Organ</b>                           | <b>Dosimetric Parameter</b> | <b>Value, mean (sd)</b> |
|----------------------------------------|-----------------------------|-------------------------|
| <b>CTV 1</b>                           | V95%                        | 99.8% (0.35)            |
|                                        | D95%                        | 68.8 Gy (2.5)           |
| <b>CTV 2</b>                           | V95%                        | 99.7% (0.37)            |
|                                        | D95%                        | 63.5 Gy (1.9)           |
| <b>CTV 3</b>                           | V95%                        | 99.4% (0.86)            |
|                                        | D95%                        | 56.4 Gy (1.6)           |
| <b>Parotid, ipsilateral</b>            | Mean dose                   | 39.9 Gy (9.6)           |
| <b>Parotid, contralateral</b>          | Mean dose                   | 17.4 Gy (9.1)           |
| <b>Oral cavity</b>                     | Mean dose                   | 13.2 Gy (7.5)           |
| <b>Larynx</b>                          | Mean dose                   | 31.5 Gy (9.8)           |
| <b>Superior pharyngeal constrictor</b> | Mean dose                   | 56.2 Gy (9.1)           |
|                                        | V50%                        | 78.5% (21.1)            |
| <b>Middle pharyngeal constrictor</b>   | Mean dose                   | 52.8 Gy (13.5)          |
|                                        | V50%                        | 67.1% (33.9)            |
| <b>Inferior pharyngeal constrictor</b> | Mean                        | 33.6 Gy (9.7)           |
|                                        | V50%                        | 16.2% (16.1)            |
| <b>Brainstem</b>                       | D2%                         | 24.9 Gy (9.2)           |
| <b>Spinal cord</b>                     | D2%                         | 30.6 Gy (7.8)           |
| <b>Esophagus</b>                       | Mean dose                   | 16.8 Gy (8.9)           |
| <b>Mandible</b>                        | Mean dose                   | 25.4 Gy (7.5)           |
|                                        | D2%                         | 65.7 Gy (5.5)           |

**Supplementary Table 2.** Patient, disease, and treatment characteristics and outcomes for 5 patients who developed any disease recurrence following proton therapy for oropharyngeal cancer.

| Age | Sex | Smoking status | Primary site                                            | Initial stage      | Initial Tumor p16 status | Initial therapy                                                                                    | Recurrence type                                                                                                                     | Time to recurrence | Therapy for recurrence                                                      | Patient vital and disease status                                          |
|-----|-----|----------------|---------------------------------------------------------|--------------------|--------------------------|----------------------------------------------------------------------------------------------------|-------------------------------------------------------------------------------------------------------------------------------------|--------------------|-----------------------------------------------------------------------------|---------------------------------------------------------------------------|
| 57  | M   | Former         | Let tonsil                                              | T2N2bM0 (IVA)      | Positive                 | Induction carboplatin and paclitaxel followed by concurrent cisplatin-IMPT<br><br>70 Gy(RBE)/33 fx | LR + RR; possible second primary with nodal metastasis; right (contralateral) glossopharyngeal sulcus and right level Ib lymph node | 43 mos.            | Surgery and postoperative reirradiation                                     | Alive, NED; under active treatment (postoperative reirradiation)          |
| 64  | M   | Former         | Left BOT                                                | T2N2bM0 (IVA)      | Positive                 | Single modality IMPT<br><br>66 Gy(RBE)/30 fx                                                       | RR; left level IIa lymph node                                                                                                       | 20 mos.            | Salvage neck dissection                                                     | Alive, NED 3 months after salvage surgery                                 |
| 49  | M   | Never          | Synchronous primaries of base of tongue and hypopharynx | Each T4N2cM0 (IVB) | Unknown                  | Induction TPF followed by concurrent cisplatin-IMPT<br><br>70 Gy(RBE)/33 fx                        | LRR; details unknown                                                                                                                | 13 mos.            | Unknown                                                                     | DOD, 11 mos. after recurrence                                             |
| 61  | M   | Former         | Base of tongue                                          | T3N2bM0 (IVA)      | Positive                 | Concurrent cisplatin-IMPT<br><br>70 Gy(RBE)/33 fx                                                  | Distant metastases to lung with locoregional control                                                                                | 13 mos.            | Stereotactic radiation therapy to lung with subsequent disease progression; | AWD, 8 mos. after distant recurrence; not currently receiving any therapy |
| 61  | M   | Former         | Right Tonsil                                            | T2N2bM0 (IVA)      | Positive                 | Induction carboplatin and paclitaxel followed by concurrent cisplatin-IMPT<br><br>70 Gy(RBE)/33 fx | RR; right level IIa lymph node                                                                                                      | 12 mos.            | Salvage neck dissection                                                     | Alive, NED 24 mos. after salvage surgery                                  |

IMPT=intensity modulated proton therapy; TPF= taxol, cisplatin, 5-fluorouracil; LRR=locoregional recurrence; LR=local recurrence; RR=regional recurrence; NED= no evidence of disease (cancer), DOD=dead of disease (cancer); AWD=alive with disease (active cancer)
